# Supplementary material
Source: HighWire-hosted journal article supplement (https://bmjopenrespres.bmj.com/content/10/1/e001992)
Supplement: inline-supplementary-material-1 [file inline-supplementary-material-1.pdf]

Supplementary Table 1. The adverse events and MedDRA code used in the study.

| Adverse event      | MedDRA code                                                                                                                                                                                                                                                                                                                                                                                                                                                                                                                                                                                                                                                                                                                                                                                                                                                                                                                                                                                                                                                                                                                                                                                                                                                                                                                                                                                                                                                                                                                                                                                                                                                                                                                                                                                                                                                                             |
|--------------------|-----------------------------------------------------------------------------------------------------------------------------------------------------------------------------------------------------------------------------------------------------------------------------------------------------------------------------------------------------------------------------------------------------------------------------------------------------------------------------------------------------------------------------------------------------------------------------------------------------------------------------------------------------------------------------------------------------------------------------------------------------------------------------------------------------------------------------------------------------------------------------------------------------------------------------------------------------------------------------------------------------------------------------------------------------------------------------------------------------------------------------------------------------------------------------------------------------------------------------------------------------------------------------------------------------------------------------------------------------------------------------------------------------------------------------------------------------------------------------------------------------------------------------------------------------------------------------------------------------------------------------------------------------------------------------------------------------------------------------------------------------------------------------------------------------------------------------------------------------------------------------------------|
| ILD – narrow terms | SMQ code: 20000042<br>(including MedDRA code: 10000001, 10000686, 10001028, 10001713, 10001714, 10001881, 10001889, 10001890, 10001891, 10001892, 10001893, 10001895, 10004067, 10004068, 10004941, 10004942, 10006448, 10007701, 10008832, 10009164, 10011495, 10014574, 10014952, 10014957, 10014962, 10015887, 10016221, 10016222, 10016640, 10016641, 10016649, 10016656, 10016659, 10016660, 10019107, 10020463, 10021225, 10021240, 10022611, 10022612, 10022617, 10022618, 10022619, 10025088, 10025089, 10025102, 10025103, 10026724, 10026725, 10026816, 10026819, 10028397, 10028398, 10029888, 10031486, 10032390, 10032439, 10032500, 10033523, 10035698, 10035715, 10035716, 10035742, 10035743, 10035750, 10035751, 10035754, 10035755, 10036028, 10036383, 10036805, 10037316, 10037317, 10037383, 10037384, 10037411, 10037413, 10037416, 10037429, 10037431, 10037457, 10037754, 10037758, 10037765, 10038718, 10042390, 10045622, 10045623, 10047130, 10047263, 10048016, 10048594, 10049202, 10050343, 10050354, 10050385, 10051211, 10052235, 10052832, 10052833, 10052835, 10052836, 10057237, 10058824, 10059809, 10060779, 10060902, 10061473, 10061924, 10062997, 10063725, 10066090, 10066153, 10066393, 10066394, 10066544, 10066725, 10066726, 10066728, 10066732, 10067445, 10067761, 10068186, 10068805, 10069406, 10070790, 10070831, 10070852, 10072879, 10072880, 10073344, 10073657, 10074889, 10076515, 10076522, 10077942, 10078117, 10078268, 10078788, 10080547, 10080701, 10081792, 10081849, 10081920, 10081988, 10082452, 10082588, 10082838, 10082999, 10083303, 10084211, 10084305, 10084309, 10084872, 10085058, 10085188, 10085189, 10085190, 10085191, 10085345, 10085352, 10085413, 10085517, 10085536, 10085628, 10085668, 10085686, 10086041, 10086072, 10086117, 10086122, 10086597, 10086598, 10086601, 10086926, 10086935, 10087294) |
| ILD – broad terms  | SMQ code: 20000042<br>(including MedDRA code: 10000036, 10001052, 10001407, 10001408, 10001409, 10001410, 10003083, 10004795, 10006020, 10006449, 10006455, 10006456, 10006463, 10008427, 10009235, 10010187, 10010864, 10010865, 10010886, 10011496, 10013493, 10014956, 10018620, 10020119, 10021241, 10021242, 10023500, 10023601, 10023602, 10023688, 10024265, 10024266, 10024267, 10024268, 10024269, 10024270, 10024271, 10024272, 10024273, 10024274, 10025041, 10025104, 10025105, 10025106, 10025109, 10025117, 10028890, 10033569, 10034461, 10034462, 10034463, 10035008, 10035745, 10035753, 10036024, 10036025, 10036026, 10036027, 10037313, 10037314, 10037370, 10037382, 10037391, 10037392, 10037393, 10037396, 10037399, 10037412, 10037430, 10038689, 10038691, 10039081, 10039485, 10039486, 10039490, 10040579, 10042607, 10042786, 10042787, 10042809, 10042810, 10042811, 10042839, 10042954, 10045969, 10045970, 10047888, 10047889, 10048667, 10049459, 10049462, 10051222, 10051604, 10051688, 10052795, 10053133, 10053135, 10054039, 10054078, 10054079, 10056218, 10057261, 10057481, 10061230, 10063420)                                                                                                                                                                                                                                                                                                                                                                                                                                                                                                                                                                                                                                                                                                                                                 |

|                                 |                                                                                                                                                                                                                                                                                                                                                                                                                                                                                                                                                                                                                                                                                                                                                                                                                                                                                                                                                                                                                                                                                                                                                                                                                                                                                                                                                                                                                                                                                                                                                                                                                                                                                                                                                                                                                                                                                                                                                                                                                                                                                                                                                                                                                                                                                                                                                                                                                                                                                                                                                                                                                                                                       |
|---------------------------------|-----------------------------------------------------------------------------------------------------------------------------------------------------------------------------------------------------------------------------------------------------------------------------------------------------------------------------------------------------------------------------------------------------------------------------------------------------------------------------------------------------------------------------------------------------------------------------------------------------------------------------------------------------------------------------------------------------------------------------------------------------------------------------------------------------------------------------------------------------------------------------------------------------------------------------------------------------------------------------------------------------------------------------------------------------------------------------------------------------------------------------------------------------------------------------------------------------------------------------------------------------------------------------------------------------------------------------------------------------------------------------------------------------------------------------------------------------------------------------------------------------------------------------------------------------------------------------------------------------------------------------------------------------------------------------------------------------------------------------------------------------------------------------------------------------------------------------------------------------------------------------------------------------------------------------------------------------------------------------------------------------------------------------------------------------------------------------------------------------------------------------------------------------------------------------------------------------------------------------------------------------------------------------------------------------------------------------------------------------------------------------------------------------------------------------------------------------------------------------------------------------------------------------------------------------------------------------------------------------------------------------------------------------------------------|
|                                 | 10064691, 10064695, 10065256, 10065656, 10066396, 10066847, 10067200, 10067471, 10067472, 10068513, 10068801, 10069152, 10069351, 10069698, 10069924, 10069927, 10070890, 10071396, 10071397, 10071869, 10072579, 10072580, 10073584, 10074611, 10075185, 10075289, 10078247, 10078811, 10084764, 10085269, 10085895, 10086936, 10086984, 10086985, 10086986)                                                                                                                                                                                                                                                                                                                                                                                                                                                                                                                                                                                                                                                                                                                                                                                                                                                                                                                                                                                                                                                                                                                                                                                                                                                                                                                                                                                                                                                                                                                                                                                                                                                                                                                                                                                                                                                                                                                                                                                                                                                                                                                                                                                                                                                                                                         |
| Myocarditis / pericarditis (PT) | 10064539, 10011258, 10056261, 10075553, 10014961, 10081004, 10082606, 10028606, 10065218, 10065219, 10066857, 10028612, 10059026, 10064550, 10028615, 10047470, 10055036, 10079058, 10004050                                                                                                                                                                                                                                                                                                                                                                                                                                                                                                                                                                                                                                                                                                                                                                                                                                                                                                                                                                                                                                                                                                                                                                                                                                                                                                                                                                                                                                                                                                                                                                                                                                                                                                                                                                                                                                                                                                                                                                                                                                                                                                                                                                                                                                                                                                                                                                                                                                                                          |
| Thrombosis and Thromboembolism  | SMQ code: 20000081, 20000082, 20000083, 20000084<br>(including MedDRA code: 20000082, 20000083, 20000084, 10000891, 10000892, 10000893, 10000894, 10000895, 10000896, 10000897, 10000898, 10000899, 10000900, 10000901, 10000902, 10000903, 10000904, 10000905, 10000906, 10000907, 10000908, 10000909, 10000910, 10000911, 10000912, 10000913, 10000914, 10000915, 10000916, 10000917, 10000918, 10000919, 10000920, 10000921, 10000922, 10000923, 10000924, 10000925, 10000926, 10000927, 10000928, 10000929, 10000930, 10000931, 10001902, 10001903, 10002432, 10002475, 10002677, 10002678, 10002679, 10002698, 10002893, 10002897, 10002910, 10002927, 10002930, 10002933, 10002937, 10002939, 10002940, 10003078, 10003140, 10003147, 10003154, 10003155, 10003156, 10003157, 10003158, 10003159, 10003160, 10003161, 10003164, 10003166, 10003178, 10003179, 10003180, 10003181, 10003182, 10003183, 10003195, 10003604, 10003606, 10003607, 10003608, 10003609, 10003610, 10003611, 10003612, 10003613, 10003614, 10003617, 10003723, 10003724, 10003873, 10004084, 10005183, 10005184, 10006071, 10006894, 10007643, 10007681, 10007684, 10007688, 10007691, 10007692, 10007693, 10007694, 10007971, 10008023, 10008080, 10008088, 10008089, 10008090, 10008091, 10008092, 10008108, 10008109, 10008133, 10008207, 10008213, 10011077, 10011084, 10011086, 10011090, 10011091, 10011098, 10011100, 10011101, 10011103, 10011104, 10011108, 10011166, 10012545, 10012990, 10014497, 10014499, 10014500, 10014501, 10014502, 10014503, 10014504, 10014505, 10014506, 10014509, 10014510, 10014513, 10014514, 10014515, 10014516, 10014517, 10014519, 10014520, 10014525, 10014526, 10014528, 10014529, 10014530, 10014531, 10014532, 10014533, 10014534, 10014535, 10014536, 10014538, 10014539, 10014648, 10016425, 10016428, 10016431, 10016432, 10016433, 10016453, 10019250, 10019635, 10019636, 10021337, 10021338, 10021339, 10021340, 10021400, 10021758, 10021763, 10021922, 10022463, 10022561, 10023027, 10024242, 10027394, 10027395, 10027396, 10027397, 10027524, 10027577, 10027579, 10027581, 10028595, 10028596, 10028597, 10028598, 10028599, 10028602, 10028870, 10029506, 10029975, 10029991, 10029992, 10029993, 10029994, 10029995, 10029996, 10029997, 10029998, 10029999, 10030000, 10030001, 10030003, 10030006, 10030008, 10030272, 10031672, 10032467, 10032904, 10033697, 10034087, 10034571, 10035002, 10036167, 10036231, 10036348, 10036349, 10036350, 10036357, 10036358, 10036359, 10036480, 10036511, 10036512, 10036513, 10037340, 10037562, 10037563, 10037690, 10037721, 10038376, 10038380, 10038822, 10038826, 10038827, |

|                                                                                                                                                                                                                                                                                                                                                                                                                                                                                                                                                                                                                                                                                                                                                                                                                                                                                                                                                                                                                                                                                                                                                                                                                                                                                                                                                                                                                                                                                                                                                                                                                                                                                                                                                                                                                                                                                                                                                                                                                                                                                                                                                                                                                                                                                                                                                                                                                                                                                                                                                                                                                                                                                                                                                                                                                                                                                                                                                                                                                                                                                                                                                                                                                                                                                                             |
|-------------------------------------------------------------------------------------------------------------------------------------------------------------------------------------------------------------------------------------------------------------------------------------------------------------------------------------------------------------------------------------------------------------------------------------------------------------------------------------------------------------------------------------------------------------------------------------------------------------------------------------------------------------------------------------------------------------------------------------------------------------------------------------------------------------------------------------------------------------------------------------------------------------------------------------------------------------------------------------------------------------------------------------------------------------------------------------------------------------------------------------------------------------------------------------------------------------------------------------------------------------------------------------------------------------------------------------------------------------------------------------------------------------------------------------------------------------------------------------------------------------------------------------------------------------------------------------------------------------------------------------------------------------------------------------------------------------------------------------------------------------------------------------------------------------------------------------------------------------------------------------------------------------------------------------------------------------------------------------------------------------------------------------------------------------------------------------------------------------------------------------------------------------------------------------------------------------------------------------------------------------------------------------------------------------------------------------------------------------------------------------------------------------------------------------------------------------------------------------------------------------------------------------------------------------------------------------------------------------------------------------------------------------------------------------------------------------------------------------------------------------------------------------------------------------------------------------------------------------------------------------------------------------------------------------------------------------------------------------------------------------------------------------------------------------------------------------------------------------------------------------------------------------------------------------------------------------------------------------------------------------------------------------------------------------|
| 10038828, 10038831, 10039009, 10039365, 10040717, 10040730, 10042332, 10042333, 10042334, 10043211, 10043562, 10043565, 10043566, 10043567, 10043611, 10043612, 10043613, 10043614, 10043616, 10043617, 10043618, 10043620, 10043622, 10043624, 10043636, 10043637, 10043645, 10043646, 10043648, 10043821, 10043829, 10044373, 10044374, 10044375, 10044390, 10044391, 10044401, 10044405, 10044675, 10044699, 10046183, 10047532, 10048726, 10048790, 10048818, 10048963, 10048964, 10048965, 10048966, 10048988, 10049052, 10049065, 10049196, 10049440, 10049456, 10049533, 10049768, 10049845, 10049846, 10049847, 10049887, 10050277, 10050329, 10050339, 10050427, 10050592, 10051034, 10051078, 10051198, 10051592, 10051991, 10052019, 10052086, 10052244, 10052318, 10052475, 10052514, 10052515, 10052516, 10052517, 10052597, 10052714, 10052908, 10052949, 10052989, 10053003, 10053091, 10053092, 10053261, 10053350, 10053492, 10053493, 10053558, 10053620, 10053633, 10053660, 10053976, 10054156, 10054366, 10055221, 10055755, 10056382, 10056418, 10057368, 10057468, 10057490, 10057491, 10057492, 10057493, 10057518, 10057519, 10057525, 10057543, 10057544, 10057545, 10057546, 10057547, 10057548, 10057549, 10057550, 10057551, 10057552, 10057560, 10057569, 10057617, 10057702, 10057777, 10057787, 10057794, 10058069, 10058072, 10058144, 10058224, 10058475, 10058729, 10058731, 10058842, 10058903, 10058904, 10059135, 10059137, 10059613, 10059726, 10059869, 10060840, 10060848, 10061169, 10061256, 10061340, 10061651, 10061655, 10061657, 10061659, 10061751, 10062363, 10062585, 10062599, 10063025, 10063093, 10063172, 10063177, 10063518, 10063544, 10063731, 10063751, 10064345, 10064346, 10064347, 10064348, 10064601, 10064812, 10064958, 10065006, 10065009, 10065031, 10065384, 10065418, 10065557, 10065560, 10065608, 10066102, 10066286, 10066287, 10066341, 10066546, 10066581, 10066592, 10066640, 10066641, 10066645, 10066673, 10066719, 10067167, 10067273, 10067651, 10067676, 10067744, 10067748, 10067814, 10067825, 10068035, 10068109, 10068176, 10068312, 10068365, 10068503, 10068538, 10068677, 10068803, 10068903, 10069020, 10069035, 10069036, 10069037, 10069038, 10069379, 10069694, 10069695, 10069696, 10069697, 10071026, 10071111, 10071260, 10071261, 10071316, 10071550, 10071642, 10072121, 10072560, 10072561, 10072562, 10072564, 10072567, 10072639, 10072760, 10072761, 10072893, 10072896, 10073197, 10073529, 10074092, 10074318, 10074321, 10074337, 10074574, 10074575, 10074576, 10074577, 10074578, 10074600, 10074717, 10075162, 10075476, 10075505, 10076225, 10076604, 10076842, 10076895, 10077137, 10077765, 10077766, 10077772, 10077777, 10077778, 10078066, 10078067, 10078201, 10078269, 10078522, 10078523, 10078636, 10078867, 10078871, 10079262, 10079263, 10079264, 10079265, 10079266, 10079267, 10079573, 10079735, 10079739, 10079988, 10079989, 10080843, 10081144, 10081360, 10081560, 10081731, 10081893, 10082470, 10082522, 10082523, 10083408, 10083692, 10083693, 10083694, 10083695, 10083696, 10083697, 10083698, 10083699, 10083700, 10083701, 10083702, 10083703, 10083828, 10083829, 10083830, 10083831, 10083832, 10084343, 10084482, 10084483, 10084484, 10084485, 10084486, 10084487, |
|-------------------------------------------------------------------------------------------------------------------------------------------------------------------------------------------------------------------------------------------------------------------------------------------------------------------------------------------------------------------------------------------------------------------------------------------------------------------------------------------------------------------------------------------------------------------------------------------------------------------------------------------------------------------------------------------------------------------------------------------------------------------------------------------------------------------------------------------------------------------------------------------------------------------------------------------------------------------------------------------------------------------------------------------------------------------------------------------------------------------------------------------------------------------------------------------------------------------------------------------------------------------------------------------------------------------------------------------------------------------------------------------------------------------------------------------------------------------------------------------------------------------------------------------------------------------------------------------------------------------------------------------------------------------------------------------------------------------------------------------------------------------------------------------------------------------------------------------------------------------------------------------------------------------------------------------------------------------------------------------------------------------------------------------------------------------------------------------------------------------------------------------------------------------------------------------------------------------------------------------------------------------------------------------------------------------------------------------------------------------------------------------------------------------------------------------------------------------------------------------------------------------------------------------------------------------------------------------------------------------------------------------------------------------------------------------------------------------------------------------------------------------------------------------------------------------------------------------------------------------------------------------------------------------------------------------------------------------------------------------------------------------------------------------------------------------------------------------------------------------------------------------------------------------------------------------------------------------------------------------------------------------------------------------------------------|

|                                                                                                                                                                                                                                                                                                                                                                                                                                                                                                                                                                                                                                                                                                                                                                                                                                                                                                                                                                                                                                                                                                                                                                                                                                                                                                                                                                                                                                                                                                                                                                                                                                                                                                                                                                                                                                                                                                                                                                                                                                                                                                                                                                                                                                                                                                                                                                                                                                                                                                                                                                                                                                                                                                                                                                                                                                                                                                                                                                                                                                                                                                                                                                                                                                                                                                             |
|-------------------------------------------------------------------------------------------------------------------------------------------------------------------------------------------------------------------------------------------------------------------------------------------------------------------------------------------------------------------------------------------------------------------------------------------------------------------------------------------------------------------------------------------------------------------------------------------------------------------------------------------------------------------------------------------------------------------------------------------------------------------------------------------------------------------------------------------------------------------------------------------------------------------------------------------------------------------------------------------------------------------------------------------------------------------------------------------------------------------------------------------------------------------------------------------------------------------------------------------------------------------------------------------------------------------------------------------------------------------------------------------------------------------------------------------------------------------------------------------------------------------------------------------------------------------------------------------------------------------------------------------------------------------------------------------------------------------------------------------------------------------------------------------------------------------------------------------------------------------------------------------------------------------------------------------------------------------------------------------------------------------------------------------------------------------------------------------------------------------------------------------------------------------------------------------------------------------------------------------------------------------------------------------------------------------------------------------------------------------------------------------------------------------------------------------------------------------------------------------------------------------------------------------------------------------------------------------------------------------------------------------------------------------------------------------------------------------------------------------------------------------------------------------------------------------------------------------------------------------------------------------------------------------------------------------------------------------------------------------------------------------------------------------------------------------------------------------------------------------------------------------------------------------------------------------------------------------------------------------------------------------------------------------------------------|
| 10084488, 10084489, 10084490, 10084702, 10084836, 10084843, 10084868, 10085044, 10085250, 10085346, 10085489, 10085490, 10085540, 10085541, 10085583, 10085584, 10085649, 10085715, 10085779, 10085987, 10086272, 10086367, 10086376, 10086395, 10086467, 10086560, 10086596, 10086829, 10087337, 10000374, 10000980, 10001108, 10001111, 10002438, 10002475, 10002661, 10002817, 10003004, 10003098, 10003192, 10003198, 10006053, 10006147, 10006538, 10008034, 10008082, 10008116, 10008117, 10008118, 10008119, 10008120, 10008121, 10008132, 10008133, 10008134, 10008135, 10008136, 10008137, 10008189, 10008190, 10008191, 10008196, 10008197, 10008198, 10008199, 10008200, 10008201, 10008202, 10008203, 10008204, 10009161, 10009667, 10010018, 10010053, 10010217, 10010785, 10010786, 10011091, 10011108, 10011693, 10012108, 10012126, 10012769, 10013033, 10013034, 10013048, 10013203, 10013429, 10013441, 10013442, 10013443, 10013597, 10013880, 10014498, 10014499, 10014501, 10014516, 10014517, 10014525, 10014651, 10015756, 10015757, 10016743, 10016813, 10017381, 10018968, 10019005, 10019013, 10019016, 10019023, 10019465, 10019466, 10019467, 10019468, 10019469, 10019470, 10019471, 10019472, 10019473, 10019527, 10019612, 10019679, 10019680, 10020566, 10020620, 10021173, 10021754, 10021755, 10021756, 10021757, 10021759, 10021761, 10021762, 10021764, 10022103, 10022104, 10022589, 10022590, 10022656, 10022657, 10023029, 10023030, 10023987, 10024097, 10024108, 10024116, 10024131, 10027394, 10027399, 10027400, 10027401, 10027403, 10027578, 10027580, 10027925, 10027926, 10027927, 10027928, 10027929, 10027930, 10027931, 10027932, 10027933, 10027934, 10027935, 10028877, 10030002, 10030003, 10030004, 10030936, 10031494, 10032086, 10032087, 10032117, 10032442, 10032749, 10033802, 10033814, 10033826, 10033885, 10033892, 10033893, 10033985, 10035092, 10036198, 10036199, 10036204, 10036228, 10036810, 10037713, 10037714, 10037715, 10037716, 10037717, 10037718, 10037719, 10038470, 10038471, 10039146, 10039154, 10039161, 10040621, 10041413, 10041648, 10042244, 10042942, 10043337, 10043385, 10043530, 10043540, 10043541, 10043565, 10043566, 10043567, 10043568, 10043576, 10043601, 10043602, 10043603, 10043604, 10043607, 10043609, 10043610, 10043615, 10043619, 10043622, 10043623, 10043626, 10043627, 10043628, 10043634, 10043647, 10043742, 10044381, 10044399, 10045149, 10045168, 10045385, 10045388, 10045413, 10045652, 10046033, 10046181, 10046182, 10046220, 10047082, 10047083, 10047142, 10047182, 10047866, 10048333, 10048497, 10048609, 10048620, 10048632, 10048672, 10048715, 10048792, 10048863, 10049060, 10049071, 10049165, 10049166, 10049196, 10049229, 10049265, 10049584, 10049599, 10049600, 10049601, 10049680, 10049707, 10049768, 10049769, 10049824, 10049908, 10049909, 10049910, 10049936, 10049945, 10050045, 10050046, 10050329, 10050339, 10050358, 10050374, 10050375, 10050387, 10050549, 10050550, 10051149, 10051172, 10051175, 10051269, 10051404, 10051601, 10051742, 10051902, 10051913, 10052081, 10052085, 10052090, 10052173, 10052253, 10052255, 10052256, 10052257, 10052259, 10052261, 10052709, 10052715, 10052906, 10053182, 10053351, 10053375, 10053601, 10053994, 10054132, |
|-------------------------------------------------------------------------------------------------------------------------------------------------------------------------------------------------------------------------------------------------------------------------------------------------------------------------------------------------------------------------------------------------------------------------------------------------------------------------------------------------------------------------------------------------------------------------------------------------------------------------------------------------------------------------------------------------------------------------------------------------------------------------------------------------------------------------------------------------------------------------------------------------------------------------------------------------------------------------------------------------------------------------------------------------------------------------------------------------------------------------------------------------------------------------------------------------------------------------------------------------------------------------------------------------------------------------------------------------------------------------------------------------------------------------------------------------------------------------------------------------------------------------------------------------------------------------------------------------------------------------------------------------------------------------------------------------------------------------------------------------------------------------------------------------------------------------------------------------------------------------------------------------------------------------------------------------------------------------------------------------------------------------------------------------------------------------------------------------------------------------------------------------------------------------------------------------------------------------------------------------------------------------------------------------------------------------------------------------------------------------------------------------------------------------------------------------------------------------------------------------------------------------------------------------------------------------------------------------------------------------------------------------------------------------------------------------------------------------------------------------------------------------------------------------------------------------------------------------------------------------------------------------------------------------------------------------------------------------------------------------------------------------------------------------------------------------------------------------------------------------------------------------------------------------------------------------------------------------------------------------------------------------------------------------------------|

|                                                                                                                                                                                                                                                                                                                                                                                                                                                                                                                                                                                                                                                                                                                                                                                                                                                                                                                                                                                                                                                                                                                                                                                                                                                                                                                                                                                                                                                                                                                                                                                                                                                                                                                                                                                                                                                                                                                                                                                                                                                                                                                                                                                                                                                                                                                                                                                                                                                                                                                                                                                                                                                                                                                                                                                                                                                                                                                                                                                                                                                                                                                                                                                                                                                                                                             |
|-------------------------------------------------------------------------------------------------------------------------------------------------------------------------------------------------------------------------------------------------------------------------------------------------------------------------------------------------------------------------------------------------------------------------------------------------------------------------------------------------------------------------------------------------------------------------------------------------------------------------------------------------------------------------------------------------------------------------------------------------------------------------------------------------------------------------------------------------------------------------------------------------------------------------------------------------------------------------------------------------------------------------------------------------------------------------------------------------------------------------------------------------------------------------------------------------------------------------------------------------------------------------------------------------------------------------------------------------------------------------------------------------------------------------------------------------------------------------------------------------------------------------------------------------------------------------------------------------------------------------------------------------------------------------------------------------------------------------------------------------------------------------------------------------------------------------------------------------------------------------------------------------------------------------------------------------------------------------------------------------------------------------------------------------------------------------------------------------------------------------------------------------------------------------------------------------------------------------------------------------------------------------------------------------------------------------------------------------------------------------------------------------------------------------------------------------------------------------------------------------------------------------------------------------------------------------------------------------------------------------------------------------------------------------------------------------------------------------------------------------------------------------------------------------------------------------------------------------------------------------------------------------------------------------------------------------------------------------------------------------------------------------------------------------------------------------------------------------------------------------------------------------------------------------------------------------------------------------------------------------------------------------------------------------------------|
| 10054741, 10054750, 10055184, 10055278, 10055282, 10055284, 10055677, 10055678, 10055749, 10055750, 10057403, 10057493, 10057517, 10057534, 10057558, 10057613, 10057787, 10057802, 10057807, 10057822, 10058010, 10058296, 10058336, 10058408, 10058562, 10058568, 10058571, 10058707, 10058794, 10058944, 10058966, 10058977, 10058978, 10059025, 10059054, 10059063, 10059336, 10059337, 10059613, 10059829, 10060478, 10060574, 10060772, 10060839, 10060956, 10061142, 10061169, 10061216, 10061407, 10061604, 10062108, 10062506, 10062546, 10062573, 10063176, 10063382, 10063492, 10063679, 10063682, 10063868, 10063919, 10063933, 10063934, 10064039, 10064201, 10064397, 10064610, 10064620, 10064685, 10064961, 10065012, 10065013, 10065323, 10065335, 10065489, 10065496, 10065680, 10065780, 10065794, 10066055, 10066059, 10066087, 10066552, 10066553, 10066591, 10066616, 10066772, 10066856, 10067048, 10067052, 10067114, 10067130, 10067167, 10067347, 10067649, 10067650, 10067740, 10067794, 10067816, 10068067, 10068070, 10068187, 10068239, 10068256, 10068401, 10068535, 10068538, 10068543, 10068628, 10068644, 10068803, 10068826, 10068903, 10069036, 10069208, 10069729, 10069922, 10070527, 10070649, 10070671, 10070754, 10070761, 10070828, 10071043, 10071110, 10071171, 10071340, 10071341, 10071550, 10071652, 10072154, 10072226, 10072240, 10072241, 10072242, 10072243, 10072244, 10072245, 10072799, 10072917, 10072967, 10073625, 10073734, 10073735, 10073886, 10074127, 10074205, 10074398, 10074422, 10074494, 10074515, 10074583, 10074601, 10074896, 10074897, 10075178, 10075442, 10075805, 10075806, 10075968, 10076026, 10076145, 10076190, 10076303, 10076304, 10076490, 10076611, 10076654, 10076714, 10076725, 10076763, 10076838, 10076839, 10076843, 10076844, 10076845, 10076855, 10076856, 10076857, 10076858, 10076859, 10076895, 10076919, 10076920, 10076929, 10076930, 10076933, 10076934, 10077022, 10077143, 10077147, 10077148, 10077149, 10077212, 10077273, 10077353, 10077410, 10077455, 10077456, 10077479, 10077480, 10077765, 10077766, 10077777, 10077778, 10077791, 10078041, 10078043, 10078063, 10078065, 10078311, 10078352, 10078675, 10078895, 10079251, 10079523, 10079902, 10079929, 10080067, 10080069, 10080295, 10080673, 10080794, 10080795, 10080796, 10080803, 10080814, 10080924, 10081076, 10081763, 10081994, 10081996, 10082031, 10082513, 10082519, 10083006, 10083066, 10083087, 10083561, 10083562, 10083668, 10083687, 10083691, 10083786, 10083804, 10083812, 10083825, 10083826, 10083827, 10083985, 10084072, 10084091, 10084095, 10084352, 10084735, 10084858, 10084916, 10085213, 10085325, 10085458, 10085669, 10085687, 10085689, 10085691, 10085715, 10085987, 10086070, 10086158, 10086161, 10086162, 10086278, 10086367, 10086412, 10086441, 10086442, 10086443, 10086549, 10086554, 10087113, 10087222, 10081074, 10081075, 10081584, 10087402, 10087403, 10087404, 10081070, 10000853, 10000970, 10003880, 10006536, 10006537, 10007830, 10007934, 10007972, 10007976, 10008138, 10009092, 10009111, 10012089, 10012090, 10012091, 10012092, 10012093, 10012094, 10012096, 10012097, 10012098, 10012107, 10013013, 10013877, 10013878, 10013879, 10014507, 10014508, 10014511, 10014512, 10014521, |
|-------------------------------------------------------------------------------------------------------------------------------------------------------------------------------------------------------------------------------------------------------------------------------------------------------------------------------------------------------------------------------------------------------------------------------------------------------------------------------------------------------------------------------------------------------------------------------------------------------------------------------------------------------------------------------------------------------------------------------------------------------------------------------------------------------------------------------------------------------------------------------------------------------------------------------------------------------------------------------------------------------------------------------------------------------------------------------------------------------------------------------------------------------------------------------------------------------------------------------------------------------------------------------------------------------------------------------------------------------------------------------------------------------------------------------------------------------------------------------------------------------------------------------------------------------------------------------------------------------------------------------------------------------------------------------------------------------------------------------------------------------------------------------------------------------------------------------------------------------------------------------------------------------------------------------------------------------------------------------------------------------------------------------------------------------------------------------------------------------------------------------------------------------------------------------------------------------------------------------------------------------------------------------------------------------------------------------------------------------------------------------------------------------------------------------------------------------------------------------------------------------------------------------------------------------------------------------------------------------------------------------------------------------------------------------------------------------------------------------------------------------------------------------------------------------------------------------------------------------------------------------------------------------------------------------------------------------------------------------------------------------------------------------------------------------------------------------------------------------------------------------------------------------------------------------------------------------------------------------------------------------------------------------------------------------------|

|  |                                                                                                                                                                                                                                                                                                                                                                                                                                                                                                                                                                                                                                                                                                                                                                                                                                                                                                                                                                                                                                                                                                                                                                                                                                                                                                                                                                                                                                                                                                                                                                                                                                                                                                                                                                                                                                                                                                                                                                                                                                                                                                                                                                                                                                                                                                                                                                                                                                                                                                                                                                                                                                                                                                                                                                                                                                                                                                                                                                                                                                                                                                                                                                                                                                                 |
|--|-------------------------------------------------------------------------------------------------------------------------------------------------------------------------------------------------------------------------------------------------------------------------------------------------------------------------------------------------------------------------------------------------------------------------------------------------------------------------------------------------------------------------------------------------------------------------------------------------------------------------------------------------------------------------------------------------------------------------------------------------------------------------------------------------------------------------------------------------------------------------------------------------------------------------------------------------------------------------------------------------------------------------------------------------------------------------------------------------------------------------------------------------------------------------------------------------------------------------------------------------------------------------------------------------------------------------------------------------------------------------------------------------------------------------------------------------------------------------------------------------------------------------------------------------------------------------------------------------------------------------------------------------------------------------------------------------------------------------------------------------------------------------------------------------------------------------------------------------------------------------------------------------------------------------------------------------------------------------------------------------------------------------------------------------------------------------------------------------------------------------------------------------------------------------------------------------------------------------------------------------------------------------------------------------------------------------------------------------------------------------------------------------------------------------------------------------------------------------------------------------------------------------------------------------------------------------------------------------------------------------------------------------------------------------------------------------------------------------------------------------------------------------------------------------------------------------------------------------------------------------------------------------------------------------------------------------------------------------------------------------------------------------------------------------------------------------------------------------------------------------------------------------------------------------------------------------------------------------------------------------|
|  | 10014522, 10014537, 10019713, 10019714, 10021182, 10021760, 10021923, 10021924, 10022776, 10022823, 10023103, 10023237, 10024105, 10024607, 10024945, 10026926, 10026927, 10026928, 10026929, 10026930, 10026931, 10027402, 10027403, 10028239, 10029661, 10029914, 10029915, 10029916, 10029917, 10029918, 10029919, 10029925, 10030004, 10030009, 10032333, 10032334, 10032335, 10032336, 10032337, 10032338, 10032395, 10032438, 10033035, 10033036, 10034191, 10034272, 10034324, 10034883, 10034885, 10034886, 10034887, 10034893, 10034894, 10034901, 10034904, 10036206, 10036299, 10036300, 10036425, 10037300, 10037301, 10037302, 10037377, 10037378, 10037380, 10037409, 10037410, 10037421, 10037436, 10037437, 10037438, 10037458, 10037459, 10037611, 10038547, 10038548, 10038906, 10038907, 10038908, 10039366, 10039369, 10041659, 10042545, 10042554, 10042555, 10042556, 10042557, 10042558, 10042559, 10042560, 10042561, 10042562, 10042563, 10042564, 10042567, 10042568, 10042569, 10042570, 10042642, 10042793, 10043570, 10043571, 10043572, 10043573, 10043574, 10043575, 10043577, 10043578, 10043579, 10043580, 10043581, 10043582, 10043583, 10043584, 10043585, 10043586, 10043587, 10043588, 10043589, 10043590, 10043591, 10043592, 10043595, 10043596, 10043605, 10043606, 10043621, 10043625, 10043629, 10043630, 10043631, 10043632, 10043633, 10043635, 10043638, 10043639, 10043640, 10043641, 10043642, 10043643, 10044457, 10047188, 10047193, 10047195, 10047196, 10047207, 10047209, 10047216, 10047217, 10047225, 10047226, 10047230, 10047232, 10047233, 10047247, 10047248, 10047249, 10047250, 10047251, 10047252, 10047253, 10047254, 10047255, 10047256, 10047257, 10047258, 10048541, 10048589, 10048591, 10048874, 10048932, 10049446, 10049903, 10049915, 10049916, 10049917, 10049918, 10050071, 10050216, 10050224, 10050225, 10050593, 10050902, 10051031, 10051043, 10051055, 10051475, 10051567, 10052090, 10052471, 10052612, 10052698, 10052720, 10052721, 10052964, 10053377, 10053378, 10053379, 10053380, 10053381, 10053382, 10053383, 10053384, 10053681, 10053702, 10054346, 10054751, 10056293, 10056513, 10056966, 10057256, 10057337, 10057725, 10058707, 10058987, 10058988, 10058989, 10058990, 10058991, 10058992, 10059254, 10059519, 10059520, 10060905, 10061251, 10061407, 10061408, 10062173, 10062175, 10062589, 10063363, 10063389, 10063675, 10063679, 10063682, 10063909, 10063919, 10064602, 10065052, 10065139, 10065142, 10065380, 10066426, 10066529, 10066661, 10066738, 10066881, 10066899, 10067030, 10067270, 10067740, 10068046, 10068122, 10068389, 10068479, 10068605, 10068606, 10068690, 10069131, 10069133, 10069388, 10069727, 10070911, 10070915, 10071739, 10072059, 10073531, 10073708, 10073979, 10074196, 10074349, 10074397, 10074658, 10074664, 10075428, 10075429, 10075430, 10075439, 10075440, 10076226, 10076285, 10076835, 10076837, 10076841, 10077623, 10077826, 10077829, 10077852, 10078810, 10078908, 10079164, 10079209, 10080372, 10081850, 10081877, 10082030, 10082134, 10082138, 10082853, 10082854, 10083037, 10083093, 10083103, 10083106, 10083184, 10084100, 10084102, 10084157, 10084397, 10084527, 10086210, 10086463, |
|--|-------------------------------------------------------------------------------------------------------------------------------------------------------------------------------------------------------------------------------------------------------------------------------------------------------------------------------------------------------------------------------------------------------------------------------------------------------------------------------------------------------------------------------------------------------------------------------------------------------------------------------------------------------------------------------------------------------------------------------------------------------------------------------------------------------------------------------------------------------------------------------------------------------------------------------------------------------------------------------------------------------------------------------------------------------------------------------------------------------------------------------------------------------------------------------------------------------------------------------------------------------------------------------------------------------------------------------------------------------------------------------------------------------------------------------------------------------------------------------------------------------------------------------------------------------------------------------------------------------------------------------------------------------------------------------------------------------------------------------------------------------------------------------------------------------------------------------------------------------------------------------------------------------------------------------------------------------------------------------------------------------------------------------------------------------------------------------------------------------------------------------------------------------------------------------------------------------------------------------------------------------------------------------------------------------------------------------------------------------------------------------------------------------------------------------------------------------------------------------------------------------------------------------------------------------------------------------------------------------------------------------------------------------------------------------------------------------------------------------------------------------------------------------------------------------------------------------------------------------------------------------------------------------------------------------------------------------------------------------------------------------------------------------------------------------------------------------------------------------------------------------------------------------------------------------------------------------------------------------------------------|

|                                                                         |                                                                                                                                                                                              |
|-------------------------------------------------------------------------|----------------------------------------------------------------------------------------------------------------------------------------------------------------------------------------------|
|                                                                         | 10087020, 10087021, 10087022, 10087023, 10087102, 10087181, 10087208,                                                                                                                        |
| Anaphylaxis                                                             | 10002198, 10002199, 10002218, 10042930, 10042931, 10069526, 10002394, 10002395, 10002424, 10002425, 10002426, 10018257, 10018259, 10020198, 10046744, 10001734, 10001718, 10001719, 10001738 |
| Thrombocytopenia                                                        | 10043551, 10043554, 10043555, 10043560, 10043569, 10039884, 10024922, 10035528, 10035529, 10035545, 10038213, 10043546, 10074667, 10021243, 10021245, 10023095, 10051064, 10043552, 10043558 |
| Generalized convulsion                                                  | 10010916, 10010917, 10018079, 10010914, 10010904, 10010906, 10010922, 10039906, 10039910, 10016731, 10016735, 10039910, 10009234, 10010915, 10010923, 10010926, 10016733, 10003628, 10071377 |
| Guillain Barré Syndrome                                                 | 10018767, 10018766, 10042812, 10000813, 10067898, 10033803, 10049567                                                                                                                         |
| Aseptic meningitis                                                      | 10003458, 10027201, 10029669, 10057724, 10047469, 10046236, 10027260, 10027262, 10028263, 10028273, 10027250, 10027220, 10027213, 10027214, 10027222, 10027215, 10027229, 10027211, 10011253 |
| Encephalitis / Encephalomyelitis / Acute disseminated encephalomyelitis | 10014581, 10014601, 10014588, 10056198, 10014602, 10054373, 10028524, 10028526, 10028527, 10000709                                                                                           |
| Bell's Palsy                                                            | 10004223, 10033559, 10016060, 10016062, 10033808                                                                                                                                             |
| Vaccine associated enhanced disease                                     | 10085491, 10085001                                                                                                                                                                           |

Supplementary Table 2. The types and WHODrug recode number codes used in the study.

| Type of drugs        | WHODrug record number                                                                                                                                                   |
|----------------------|-------------------------------------------------------------------------------------------------------------------------------------------------------------------------|
| COVID-19 vaccines    |                                                                                                                                                                         |
| Tozinameran          | 15268625001, 15268625002, 15268625003, 15268625004, 15268625005, 15268625006, 15268625007, 15268625008, 15268625009                                                     |
| Vaxzevria            | 15268603001, 15268603002, 15268603003, 15268603004, 15268603005, 15268603006, 15268603007, 15268603008, 15268603009, 15268603010, 15268603012, 15268603013, 15268603014 |
| Elasomeran           | 15268604001, 15268604002, 15268604003, 15268604004, 15268604005, 15268604006, 15268604007, 15268604008                                                                  |
| Ad26.CO2.S           | 15268640001, 15268640002, 15268640003, 15268640004, 15268640005, 15268640006, 15268640007                                                                               |
| Gam-COVID-Vac        | 15268619005, 15268684002, 15268619007, 15268620004                                                                                                                      |
| NVX-CoV2373          | 15268611001, 15268611002, 15268611003, 15268611004, 15268611005                                                                                                         |
| GBP510               | 15268665003                                                                                                                                                             |
| Cancer therapy       |                                                                                                                                                                         |
| Bleomycin            | 001839xxxxx (94)                                                                                                                                                        |
| Gemcitabine          | 012157xxxxx (326)                                                                                                                                                       |
| Erlotinib            | 016114xxxxx (93)                                                                                                                                                        |
| Gefitinib            | 015601xxxxx (92)                                                                                                                                                        |
| Panitumumab          | 017773xxxxx (5)                                                                                                                                                         |
| Cetuximab            | 014905xxxxx (5)                                                                                                                                                         |
| Everolimus           | 015069xxxxx (61)                                                                                                                                                        |
| Temsirolimus         | 017165xxxxx (6)                                                                                                                                                         |
| Sirolimus            | 014591xxxxx (35)                                                                                                                                                        |
| Nivolumab            | 078729xxxxx (4)                                                                                                                                                         |
| Pembrolizumab        | 083428xxxxx (6)                                                                                                                                                         |
| Avelumab             | 089186xxxxx (3)                                                                                                                                                         |
| Durvalumab           | 087572xxxxx (4)                                                                                                                                                         |
| Ipilimumab           | 057456xxxxx (7)                                                                                                                                                         |
| Rheumatology therapy |                                                                                                                                                                         |
| methotrexate         | 001138xxxxx (416)                                                                                                                                                       |
| Leflunomide          | 014148xxxxx (214)                                                                                                                                                       |
| Infliximab           | 014456xxxxx (24)                                                                                                                                                        |
| Etanercept           | 014906xxxxx (25)                                                                                                                                                        |
| Adalimumab           | 016129xxxxx (40)                                                                                                                                                        |
| Tocilizumab          | 017591xxxxx (11)                                                                                                                                                        |
| Rituximab            | 014025xxxxx (60)                                                                                                                                                        |
| Anti-infection       |                                                                                                                                                                         |
| Nitrofurantoin       | 000244xxxxx (230)                                                                                                                                                       |
| Daptomycin           | 016772xxxxx (57)                                                                                                                                                        |
| Interferon           | 005968xxxxx (4)                                                                                                                                                         |
| Cardiology drugs     |                                                                                                                                                                         |
| Amiodarone           | 001331xxxxx (293)                                                                                                                                                       |
| Bepridil             | 007889xxxxx (11)                                                                                                                                                        |
| Lovastatin           | 008967xxxxx (249)                                                                                                                                                       |
| Simvastatin          | 008481xxxxx (946)                                                                                                                                                       |
| Pravastatin          | 008804xxxxx (381)                                                                                                                                                       |
| Atorvastatin         | 013261xxxxx (1225)                                                                                                                                                      |
| Fluvastatin          | 012245xxxxx (146)                                                                                                                                                       |



|              |                   |
|--------------|-------------------|
| Rosuvastatin | 015886xxxxx (999) |
| Cerivastatin | 013413xxxxx (28)  |

The bracket () indicates the numbers of drugs.

Supplementary Table 3. Analysis strategies

| Analysis types                                                                                                                          | Case             | Non-case | Vaccine of interest | Other vaccines     | Comment                                      |
|-----------------------------------------------------------------------------------------------------------------------------------------|------------------|----------|---------------------|--------------------|----------------------------------------------|
| <b>Primary analysis</b>                                                                                                                 | ILD narrow terms | Non-ILD  | COVID-19 vaccines   | The other vaccines |                                              |
| <b>Subgroup analysis</b>                                                                                                                | ILD narrow terms | Non-ILD  | COVID-19 vaccines   | The other vaccines |                                              |
| 1. Age                                                                                                                                  | ILD narrow terms | Non-ILD  | COVID-19 vaccines   | The other vaccines | <65 and ≥65 years                            |
| 2. Gender                                                                                                                               | ILD narrow terms | Non-ILD  | COVID-19 vaccines   | The other vaccines | Male and female                              |
| 3. Region                                                                                                                               | ILD narrow terms | Non-ILD  | COVID-19 vaccines   | The other vaccines | Western Pacific region and the other regions |
| <b>Sensitivity analysis</b>                                                                                                             |                  |          |                     |                    |                                              |
| 1. ICSRs reported as suspected, concomitant, and interaction drugs                                                                      | ILD narrow terms | Non-ILD  | COVID-19 vaccines   | The other vaccines | Diverse AE definition                        |
| 2. Extended the ILD definition (broad search)                                                                                           | ILD narrow+broad | Non-ILD  | COVID-19 vaccines   | The other vaccines | Diverse AE definition (Information bias)     |
| 3. ICSRs excluding reports included either cancer therapy or rheumatology drugs or anti-infection agents, cardiology drugs <sup>†</sup> | ILD narrow terms | Non-ILD  | COVID-19 vaccines   | The other vaccines | Drug competition bias                        |
| 4. ICSRs excluding reports included COVID-19 vaccine AESIs                                                                              | ILD narrow terms | Non-ILD  | COVID-19 vaccines   | The other vaccines | Event competition bias                       |
| 5. Restricted to serious AE reports                                                                                                     | ILD narrow terms | Non-ILD  | COVID-19 vaccines   | The other vaccines | Weber effect                                 |
| 6. ICSRs before August 6, 2021                                                                                                          | ILD narrow terms | Non-ILD  | COVID-19 vaccines   | The other vaccines | Notoriety bias                               |
| 7. Definition of influenza vaccine as positive control                                                                                  | ILD narrow terms | Non-ILD  | COVID-19 vaccines   | Influenza vaccine  | Positive control                             |

<sup>†</sup>Cancer therapy: bleomycin; gemcitabine; Epidermal Growth Factor Receptor (EGFR)-targeted agent (erlotinib, gefitinib, panitumumab, cetuximab); mammalian target of rapamycin (MTOR)-inhibitor (everolimus, temsirolimus, sirolimus); immune checkpoint inhibitor (nivolumab, pembrolizumab, avelumab, durvalumab, ipilimumab), rheumatology drugs: methotrexate; leflunomide, biological disease-modifying anti-rheumatic drugs (DMARDs) (tumor necrosis factor (TNF) agent (infliximab, etanercept, adalimumab), tocilizumab, rituximab), anti-infection agents (nitrofurantoin, daptomycin, interferon), cardiology drugs (amiodarone, bepridil, statin (lovastatin, simvastatin, pravastatin, atorvastatin, fluvastatin, rosuvastatin, cerivastatin))

ILD, interstitial lung disease; COVID-19, coronavirus disease 2019; AESI, adverse event of special interest

Supplementary Table 4. Characteristics of interstitial lung disease (ILD) by COVID-19 vaccines, influenza vaccines, and others.

|                                        | COVID-19 vaccines |        | Influenza vaccines |        | Others |        |
|----------------------------------------|-------------------|--------|--------------------|--------|--------|--------|
|                                        | N                 | %      | N                  | %      | N      | %      |
| <b>Reported quarter (Q)</b>            |                   |        |                    |        |        |        |
| 2020.4Q (Dec. 13, 2020~Dec. 31, 2020)  | 0                 | (0.0)  | 0                  | (0.0)  | 0      | (0.0)  |
| 2021.1Q (Jan. 1, 2021 ~ Mar. 31, 2021) | 46                | (7.4)  | 3                  | (8.8)  | 1      | (3.0)  |
| 2021.2Q (Apr. 1, 2021 ~ Jun. 30, 2021) | 100               | (16.0) | 5                  | (14.7) | 1      | (3.0)  |
| 2021.3Q (Jul. 1, 2021 ~ Sep. 30, 2021) | 107               | (17.1) | 8                  | (23.5) | 2      | (6.1)  |
| 2021.4Q (Oct. 1, 2021 ~ Dec. 31, 2021) | 97                | (15.5) | 3                  | (8.8)  | 6      | (18.2) |
| 2022.1Q (Jan. 1, 2022 ~ Mar. 31, 2022) | 100               | (16.0) | 4                  | (11.8) | 1      | (3.0)  |
| 2022.2Q (Apr. 1, 2022 ~ Jun. 30, 2022) | 70                | (11.2) | 4                  | (11.8) | 8      | (24.2) |
| 2022.3Q (Jul. 1, 2022 ~ Sep. 30, 2022) | 44                | (7.0)  |                    |        |        |        |
| 2022.4Q (Oct. 1, 2022 ~ Dec. 31, 2022) | 51                | (8.2)  | 4                  | (11.8) | 13     | (39.4) |
| 2023.1Q (Jan. 1, 2023 ~ Jan. 26, 2023) | 11                | (1.8)  | 3                  | (8.8)  | 1      | (3.0)  |
| <b>Age groups</b>                      |                   |        |                    |        |        |        |
| 0~27 days                              |                   |        | 2                  | (5.9)  |        |        |
| 28 days to 23 months                   | 2                 | (0.3)  | 3                  | (8.8)  | 21     | (63.6) |
| 2~11 years                             |                   |        | 1                  | (2.9)  | 3      | (9.1)  |
| 12~17 years                            | 4                 | (0.6)  |                    |        |        |        |
| 18~44 years                            | 91                | (14.5) | 1                  | (2.9)  | 1      | (3.0)  |
| 45~64 years                            | 182               | (29.1) | 6                  | (17.7) | 2      | (6.1)  |
| 65~74 years                            | 134               | (21.4) | 11                 | (32.4) | 4      | (12.1) |
| ≥ 75 years                             | 213               | (34.0) | 10                 | (29.4) | 2      | (6.1)  |
| <b>Sex</b>                             |                   |        |                    |        |        |        |
| Male                                   | 325               | (51.9) | 18                 | (52.9) | 20     | (60.6) |
| Female                                 | 301               | (48.1) | 16                 | (47.1) | 13     | (39.4) |
| <b>Report type</b>                     |                   |        |                    |        |        |        |
| Spontaneous                            | 578               | (92.3) | 29                 | (85.3) | 23     | (69.7) |
| Report from study                      | 41                | (6.6)  | 5                  | (14.7) | 10     | (30.3) |
| Other                                  | 7                 | (1.1)  |                    |        |        |        |
| <b>Serious</b>                         |                   |        |                    |        |        |        |
| Yes                                    | 578               | (92.3) | 31                 | (91.2) | 29     | (87.9) |
| <b>Seriousness</b>                     |                   |        |                    |        |        |        |
| Death                                  | 107               | (17.1) | 7                  | (20.6) | 5      | (15.2) |
| Life threatening                       | 96                | (15.3) | 3                  | (8.8)  |        |        |
| Caused/Prolonged Hospitalization       | 260               | (41.5) | 14                 | (41.2) | 16     | (48.5) |
| Disabling/Incapacitating               | 13                | (2.1)  | 1                  | (2.9)  |        |        |
| Congenital anomaly/Birth defect        |                   |        |                    |        |        |        |
| Other                                  | 102               | (16.3) | 6                  | (17.7) | 8      | (24.2) |
| <b>Region</b>                          |                   |        |                    |        |        |        |
| African                                | 4                 | (0.6)  |                    |        |        |        |
| Americas                               | 42                | (6.7)  | 9                  | (26.5) | 5      | (15.2) |
| South-East Asia                        | 5                 | (0.8)  |                    |        | 1      | (3.0)  |
| European                               | 543               | (86.7) | 20                 | (58.8) | 25     | (75.8) |
| Eastern Mediterranean                  | 7                 | (1.1)  | 1                  | (2.9)  |        |        |
| Western Pacific                        | 25                | (4.0)  | 4                  | (11.8) | 2      | (6.1)  |
| <b>Notifier type</b>                   |                   |        |                    |        |        |        |
| Physician                              | 493               | (78.8) | 24                 | (70.6) | 21     | (63.6) |
| Pharmacist                             | 45                | (7.2)  | 3                  | (8.8)  | 3      | (9.1)  |
| Other Health Professional              | 88                | (14.1) | 7                  | (20.6) | 9      | (27.3) |
| <b>Time to onset</b>                   |                   |        |                    |        |        |        |

---

|                |           |           |            |
|----------------|-----------|-----------|------------|
| Mean±SD        | 33.5±61.7 | 17.1±24.7 | 40.9±128.7 |
| Median (Q1-Q3) | 8 (1-36)  | 5 (2-23)  | 6 (1-21)   |

---

SD; standard deviation

COVID-19 vaccines contained Tozinameran, Elasmomeran, Vaxzevira, Ad26.COVS.2.S, Gam-COVID-Vac, and NVX-CoV2373. Influenza vaccines were defined using Anatomical Therapeutic Chemical (ATC) classification; J07BB.

Supplementary Table 5. The list of reported adverse events (AEs) in narrow and broad terms (&gt;2 report).

| No. | Narrow terms                                              |       |      | Narrow + broad terms                          |       |      |
|-----|-----------------------------------------------------------|-------|------|-----------------------------------------------|-------|------|
|     | MedDRA terms                                              | Count | %    | MedDRA terms                                  | Count | %    |
| 1   | Pneumonitis                                               | 134   | 19.7 | Pneumonitis                                   | 134   | 12.3 |
| 2   | Interstitial lung disease                                 | 70    | 10.3 | Acute respiratory distress syndrome           | 128   | 11.7 |
| 3   | Interstitial pneumonia                                    | 46    | 6.8  | Sarcoidosis                                   | 83    | 7.6  |
| 4   | Pulmonitis                                                | 45    | 6.6  | Interstitial lung disease                     | 70    | 6.4  |
| 5   | Lung infiltration                                         | 37    | 5.4  | Interstitial pneumonia                        | 46    | 4.2  |
| 6   | Interstitial pneumonitis                                  | 32    | 4.7  | Pulmonitis                                    | 45    | 4.1  |
| 7   | Bronchiolitis                                             | 30    | 4.4  | Lung infiltration                             | 37    | 3.4  |
| 8   | Pneumonia interstitial                                    | 30    | 4.4  | Interstitial pneumonitis                      | 32    | 2.9  |
| 9   | Ground glass opacity in thoracic CT                       | 27    | 4.0  | Pneumonia interstitial                        | 30    | 2.7  |
| 10  | Pulmonary fibrosis                                        | 19    | 2.8  | Bronchiolitis                                 | 30    | 2.7  |
| 11  | Lung inflammation                                         | 18    | 2.7  | Cryptogenic organising pneumonia              | 29    | 2.7  |
| 12  | Eosinophilic pneumonia                                    | 17    | 2.5  | ARDS                                          | 27    | 2.5  |
| 13  | Lung opacity                                              | 16    | 2.4  | Ground glass opacity in thoracic CT           | 27    | 2.5  |
| 14  | Eosinophilic granulomatosis with polyangiitis             | 16    | 2.4  | Pulmonary alveolar haemorrhage                | 21    | 1.9  |
| 15  | Pulmonary infiltration                                    | 15    | 2.2  | Pulmonary fibrosis                            | 19    | 1.7  |
| 16  | Alveolitis                                                | 13    | 1.9  | Lung inflammation                             | 18    | 1.6  |
| 17  | Hypersensitivity pneumonitis                              | 12    | 1.8  | Eosinophilic pneumonia                        | 17    | 1.6  |
| 18  | Bilateral pulmonary infiltrates                           | 10    | 1.5  | Eosinophilic granulomatosis with polyangiitis | 16    | 1.5  |
| 19  | Exacerbation of idiopathic pulmonary fibrosis             | 10    | 1.5  | Lung opacity                                  | 16    | 1.5  |
| 20  | Churg Strauss syndrome                                    | 9     | 1.3  | Pulmonary infiltration                        | 15    | 1.4  |
| 21  | Lung fibrosis                                             | 8     | 1.2  | Adult respiratory stress syndrome             | 14    | 1.3  |
| 22  | Alveolitis allergic                                       | 7     | 1.0  | Alveolitis                                    | 13    | 1.2  |
| 23  | Idiopathic pulmonary fibrosis                             | 6     | 0.9  | Granulomatosis with polyangiitis              | 13    | 1.2  |
| 24  | Pulmonary vasculitis                                      | 6     | 0.9  | Hypersensitivity pneumonitis                  | 12    | 1.1  |
| 25  | Acute respiratory distress syndrome                       | 6     | 0.9  | Organizing pneumonia                          | 11    | 1.0  |
| 26  | ARDS                                                      | 5     | 0.7  | A.R.D.S.                                      | 11    | 1.0  |
| 27  | Pneumonia eosinophilic                                    | 4     | 0.6  | Antisynthetase syndrome                       | 10    | 0.9  |
| 28  | Interstitial pneumonia aggravated                         | 4     | 0.6  | Bilateral pulmonary infiltrates               | 10    | 0.9  |
| 29  | Diffuse alveolar damage                                   | 4     | 0.6  | Exacerbation of idiopathic pulmonary fibrosis | 10    | 0.9  |
| 30  | Rheumatoid arthritis-associated interstitial lung disease | 4     | 0.6  | Churg Strauss syndrome                        | 9     | 0.8  |
| 31  | Ground glass opacity on chest X-ray                       | 4     | 0.6  | Polyarteritis nodosa                          | 9     | 0.8  |
| 32  | Fibrosis lung                                             | 3     | 0.4  | Lung fibrosis                                 | 8     | 0.7  |
| 33  | Lymphocytic alveolitis                                    | 3     | 0.4  | Cryptogenic organizing                        | 8     | 0.7  |

|    |                                |   |     |                                                           |   |     |
|----|--------------------------------|---|-----|-----------------------------------------------------------|---|-----|
|    |                                |   |     | pneumonia                                                 |   |     |
| 34 | Lung infiltration NOS          | 3 | 0.4 | Pulmonary sarcoidosis                                     | 7 | 0.6 |
| 35 | Interstitial lung fibrosis     | 3 | 0.4 | Goodpasture's syndrome                                    | 7 | 0.6 |
| 36 | Acute interstitial pneumonitis | 3 | 0.4 | Organising pneumonia                                      | 7 | 0.6 |
| 37 | Pulmonary alveolar haemorrhage | 3 | 0.4 | Wegener's granulomatosis                                  | 7 | 0.6 |
| 38 |                                |   |     | Alveolitis allergic                                       | 7 | 0.6 |
| 39 |                                |   |     | Loefgren syndrome                                         | 6 | 0.5 |
| 40 |                                |   |     | Pulmonary vasculitis                                      | 6 | 0.5 |
| 41 |                                |   |     | Idiopathic pulmonary fibrosis                             | 6 | 0.5 |
| 42 |                                |   |     | Adult respiratory distress syndrome                       | 6 | 0.5 |
| 43 |                                |   |     | Rheumatoid arthritis-associated interstitial lung disease | 4 | 0.4 |
| 44 |                                |   |     | Ground glass opacity on chest X-ray                       | 4 | 0.4 |
| 45 |                                |   |     | Interstitial pneumonia aggravated                         | 4 | 0.4 |
| 46 |                                |   |     | Diffuse alveolar damage                                   | 4 | 0.4 |
| 47 |                                |   |     | Granulomatous polyangiitis                                | 4 | 0.4 |
| 48 |                                |   |     | Pneumonia eosinophilic                                    | 4 | 0.4 |
| 49 |                                |   |     | Syndrome respiratory distress adult                       | 4 | 0.4 |
| 50 |                                |   |     | Periarteritis nodosa                                      | 4 | 0.4 |
| 51 |                                |   |     | Lung injury                                               | 3 | 0.3 |
| 52 |                                |   |     | Lung infiltration NOS                                     | 3 | 0.3 |
| 53 |                                |   |     | Wegeners granulomatosis                                   | 3 | 0.3 |
| 54 |                                |   |     | Pulmonary renal syndrome                                  | 3 | 0.3 |
| 55 |                                |   |     | Acute interstitial pneumonitis                            | 3 | 0.3 |
| 56 |                                |   |     | Pulmonary granuloma                                       | 3 | 0.3 |
| 57 |                                |   |     | Pulmonary alveolar hemorrhage                             | 3 | 0.3 |
| 58 |                                |   |     | Interstitial lung fibrosis                                | 3 | 0.3 |
| 59 |                                |   |     | Fibrosis lung                                             | 3 | 0.3 |
| 60 |                                |   |     | Lymphocytic alveolitis                                    | 3 | 0.3 |
| 61 |                                |   |     | Lung transplant rejection                                 | 3 | 0.3 |

\* only included in narrow and broad terms

MedDRA, medical dictionary for regulatory activities

Supplementary Table 6. Reporting odds ratio (ROR) of subgroups analyses in primary analysis

| Type of analysis                   | ILD-cases  | Non-cases    | ROR (95% CI)     |
|------------------------------------|------------|--------------|------------------|
| <b>Subgroup analysis 1, age</b>    |            |              |                  |
| Age<65 (case=315, non-case=3,150)  |            |              |                  |
| The other vaccines                 | 36 (11.4)  | 339 (10.8)   |                  |
| COVID-19 vaccines                  | 268 (85.1) | 2,447 (77.7) | 0.94 (0.65–1.35) |
| mRNA COVID-19 vaccines             | 198 (62.9) | 1,611 (51.1) | 1.16 (0.80–1.68) |
| Tozinameran                        | 158 (52.2) | 1,328 (48.1) | 1.12 (0.77–1.64) |
| Elasomeran                         | 40 (13.2)  | 272 (9.8)    | 1.39 (0.86–2.23) |
| Viral vector COVID-19 vaccines     | 70 (22.2)  | 837 (26.6)   | 0.79 (0.52–1.20) |
| Vaxzevria                          | 64 (21.1)  | 676 (24.5)   | 0.89 (0.58–1.37) |
| Gam-COVID-Vac                      | 0 (0.0)    | 1 (0.0)      | NC               |
| Ad26.COV2.S                        | 5 (1.7)    | 147 (5.3)    | 0.32 (0.12–0.83) |
| Protein-based COVID-19 vaccines    | 0 (0.0)    | 1 (0.0)      | NC               |
| NVX-CoV2373                        | 0 (0.0)    | 1 (0.0)      | NC               |
| Others                             | 11 (3.5)   | 362 (11.5)   | 0.29 (0.14–0.57) |
| Age≥65 (case=364, non-case=3,640)  |            |              |                  |
| The other vaccines                 | 17 (4.7)   | 120 (3.3)    |                  |
| COVID-19 vaccines                  | 347 (95.3) | 3,520 (96.7) | 0.70(0.41–1.17)  |
| mRNA COVID-19 vaccines             | 250 (68.7) | 2,301 (63.2) | 0.77(0.45–1.30)  |
| Tozinameran                        | 215 (65.2) | 1,954 (59.7) | 0.78(0.46–1.32)  |
| Elasomeran                         | 33 (10.0)  | 339 (10.4)   | 0.69(0.37–1.28)  |
| Viral vector COVID-19 vaccines     | 67 (18.4)  | 881 (24.2)   | 0.54(0.31–0.95)  |
| Vaxzevria                          | 62 (18.8)  | 785 (24.0)   | 0.56(0.32–0.99)  |
| Gam-COVID-Vac                      | 0 (0.0)    | 1 (0.0)      | NC               |
| Ad26.COV2.S                        | 3 (0.9)    | 73 (2.2)     | 0.29(0.08–1.02)  |
| Protein-based COVID-19 vaccines    | 0 (0.0)    | 2 (0.1)      | NC               |
| NVX-CoV2373                        | 0 (0.0)    | 2 (0.1)      | NC               |
| Others                             | 30 (8.2)   | 336 (9.2)    | 0.63(0.34–1.18)  |
| <b>Subgroup analysis 2, gender</b> |            |              |                  |
| Male (case=356, non-case=3,230)    |            |              |                  |
| The other vaccines                 | 31 (8.7)   | 254 (7.1)    |                  |
| COVID-19 vaccines                  | 325 (91.3) | 3,306 (92.9) | 0.81(0.55–1.19)  |
| mRNA COVID-19 vaccines             | 235 (66.0) | 2,009 (56.4) | 0.96(0.65–1.43)  |
| Tozinameran                        | 194 (57.9) | 1,697 (54.2) | 0.94(0.63–1.40)  |
| Elasomeran                         | 40 (11.9)  | 304 (9.7)    | 1.08(0.66–1.77)  |
| Viral vector COVID-19 vaccines     | 71 (19.9)  | 898 (25.2)   | 0.65(0.42–1.01)  |
| Vaxzevria                          | 67 (20.0)  | 739 (23.6)   | 0.74(0.47–1.16)  |
| Gam-COVID-Vac                      | 0 (0.0)    | 2 (0.1)      | NC               |
| Ad26.COV2.S                        | 3 (0.9)    | 137 (4.4)    | 0.18(0.05–0.60)  |
| Protein-based COVID-19 vaccines    | 0 (0.0)    | 0 (0.0)      | NC               |
| NVX-CoV2373                        | 0 (0.0)    | 0 (0.0)      | NC               |
| Others                             | 19 (5.3)   | 399 (11.2)   | 0.39(0.22–0.71)  |
| Female (case=305, non-case=3,050)  |            |              |                  |
| The other vaccines                 | 22 (6.8)   | 205 (6.4)    | -                |
| COVID-19 vaccines                  | 301 (93.2) | 3,025 (93.7) | 0.93(0.59–1.46)  |
| mRNA COVID-19 vaccines             | 213 (65.9) | 1,903 (58.9) | 1.04(0.66–1.66)  |
| Tozinameran                        | 22 (7.4)   | 205 (7.1)    | 1.05(0.66–1.68)  |
| Elasomeran                         | 179 (60.1) | 1,585 (54.6) | 1.00(0.57–1.77)  |
| Viral vector COVID-19 vaccines     | 66 (20.4)  | 820 (25.4)   | 0.75(0.45–1.24)  |
| Vaxzevria                          | 59 (19.8)  | 722 (24.9)   | 0.76(0.46–1.27)  |
| Gam-COVID-Vac                      | 0 (0.0)    | 0 (0.0)      | NC               |

|                                                |            |              |                      |
|------------------------------------------------|------------|--------------|----------------------|
| Ad26.COVS2.S                                   | 5 (1.7)    | 83 (2.9)     | 0.56(0.21–1.53)      |
| Protein-based COVID-19 vaccines                | 0 (0.0)    | 3 (0.1)      | <.001 (<.001->999.9) |
| NVX-CoV2373                                    | 0 (0.0)    | 3 (0.1)      | <.001 (<.001->999.9) |
| Others                                         | 22 (6.8)   | 299 (9.3)    | 0.69(0.37–1.27)      |
| <b>Subgroup analysis 3, region</b>             |            |              |                      |
| Western Pacific Region (case=30, non-case=933) |            |              |                      |
| The other vaccines                             | 5 (16.7)   | 73 (7.8)     |                      |
| COVID-19 vaccines                              | 25 (83.3)  | 860 (92.2)   | 0.42(0.16–1.14)      |
| mRNA COVID-19 vaccines                         | 14 (46.7)  | 359 (38.5)   | 0.57(0.20–1.63)      |
| Tozinameran                                    | 13 (48.2)  | 316 (45.6)   | 0.60(0.21–1.74)      |
| Elasomeran                                     | 1 (3.7)    | 43 (6.2)     | 0.34(0.04–3.00)      |
| Viral vector COVID-19 vaccines                 | 10 (33.3)  | 267 (28.6)   | 0.55(0.18–1.65)      |
| Vaxzevria                                      | 8 (29.6)   | 219 (31.6)   | 0.53(0.17–1.68)      |
| Gam-COVID-Vac                                  | 0 (0.0)    | 0 (0.0)      | NC                   |
| Ad26.COVS2.S                                   | 0 (0.0)    | 42 (6.1)     | NC                   |
| Protein-based COVID-19 vaccines                | 0 (0.0)    | 0 (0.0)      | NC                   |
| NVX-CoV2373                                    | 0 (0.0)    | 0 (0.0)      | NC                   |
| Others                                         | 1 (3.3)    | 234 (25.1)   | 0.06(0.01–0.54)      |
| The other regions (case=649, non-case=5,857)   |            |              |                      |
| The other vaccines                             | 48 (7.4)   | 386 (6.6)    |                      |
| COVID-19 vaccines                              | 601 (92.6) | 5,471 (93.4) | 0.88(0.65–1.21)      |
| mRNA COVID-19 vaccines                         | 434 (66.9) | 3,553 (60.7) | 0.98(0.72–1.35)      |
| Tozinameran                                    | 360 (59.4) | 2,966 (55.5) | 0.98(0.71–1.34)      |
| Elasomeran                                     | 72 (11.9)  | 568 (10.6)   | 1.02(0.69–1.50)      |
| Viral vector COVID-19 vaccines                 | 127 (19.6) | 1,451 (24.8) | 0.70(0.50–1.00)      |
| Vaxzevria                                      | 118 (19.5) | 1,242 (23.2) | 0.76(0.54–1.09)      |
| Gam-COVID-Vac                                  | 0 (0.0)    | 2 (0.0)      | NC                   |
| Ad26.COVS2.S                                   | 8 (1.3)    | 178 (3.3)    | 0.36(0.17–0.78)      |
| Protein-based COVID-19 vaccines                | 0 (0.0)    | 3 (0.1)      | NC                   |
| NVX-CoV2373                                    | 0 (0.0)    | 3 (0.1)      | NC                   |
| Others                                         | 40 (6.2)   | 464 (7.9)    | 0.69(0.45–1.08)      |

COVID-19, coronavirus disease 2019; ILD, interstitial lung disease; ROR, reporting odds ratio; NC, not calculated



Supplementary Table 7. Reporting odds ratio (ROR) of sensitivity analyses

| Type of analysis                                         | ILD cases    | Non-cases     | ROR (95% CI)         |
|----------------------------------------------------------|--------------|---------------|----------------------|
| <b>Sensitivity analysis 1 (case=644, non-case=6,440)</b> |              |               |                      |
| The other vaccines                                       | 53 (7.8)     | 449 (6.6)     |                      |
| COVID-19 vaccines                                        | 626 (92.2)   | 6,338 (93.4)  | 0.84(0.62–1.13)      |
| mRNA COVID-19 vaccines                                   | 448 (66.0)   | 3,863 (56.9)  | 0.98(0.73–1.33)      |
| Tozinameran                                              | 373 (58.9)   | 3,265 (54.3)  | 0.97(0.71–1.31)      |
| Elasomeran                                               | 73 (11.5)    | 582 (9.7)     | 1.06(0.73–1.55)      |
| Viral vector COVID-19 vaccines                           | 137 (20.2)   | 1,743 (25.7)  | 0.67(0.48–0.93)      |
| Vaxzevria                                                | 126 (19.9)   | 1,469 (24.4)  | 0.73(0.52–1.02)      |
| Gam-COVID-Vac                                            | 0 (0.0)      | 4 (0.1)       | NC                   |
| Ad26.COV2.S                                              | 8 (1.3)      | 241 (4.0)     | 0.28(0.13–0.60)      |
| Protein-based COVID-19 vaccines                          | 0 (0.0)      | 2 (0.0)       | NC                   |
| NVX-CoV2373                                              | 0 (0.0)      | 2 (0.0)       | NC                   |
| Others                                                   | 41 (6.0)     | 730 (10.8)    | 0.48(0.31–0.73)      |
| <b>Sensitivity analysis 2 (case=548, non-case=5,480)</b> |              |               |                      |
| The other vaccines                                       | 67 (6.1)     | 521 (4.8)     |                      |
| COVID-19 vaccines                                        | 1,026 (93.9) | 10,409 (95.2) | 0.77(0.59–1.00)      |
| mRNA COVID-19 vaccines                                   | 704 (64.4)   | 6,340 (58.0)  | 0.86(0.66–1.13)      |
| Tozinameran                                              | 604 (60.0)   | 5,326 (55.0)  | 0.88(0.68–1.15)      |
| Elasomeran                                               | 95 (9.4)     | 983 (10.1)    | 0.75(0.54–1.05)      |
| Viral vector COVID-19 vaccines                           | 251 (23.0)   | 2,906 (26.6)  | 0.67(0.51–0.89)      |
| Vaxzevria                                                | 221 (22.0)   | 2,483 (25.6)  | 0.69(0.52–0.92)      |
| Gam-COVID-Vac                                            | 1 (0.1)      | 4 (0.0)       | 1.94(0.21–17.65)     |
| Ad26.COV2.S                                              | 19 (1.9)     | 372 (3.8)     | 0.40(0.24–0.67)      |
| Protein-based COVID-19 vaccines                          | 0 (0.0)      | 3 (0.0)       | NC                   |
| NVX-CoV2373                                              | 0 (0.0)      | 3 (0.0)       | NC                   |
| Others                                                   | 71 (6.5)     | 1,160 (10.6)  | 0.48(0.34–0.68)      |
| <b>Sensitivity analysis 3 (case=567, non-case=6,131)</b> |              |               |                      |
| The other vaccines                                       | 41 (7.1)     | 416 (7.2)     |                      |
| COVID-19 vaccines                                        | 538 (92.9)   | 5,374 (92.8)  | 1.02(0.73–1.42)      |
| mRNA COVID-19 vaccines                                   | 391 (67.5)   | 3,264 (56.4)  | 1.22(0.87–1.70)      |
| Tozinameran                                              | 327 (59.9)   | 2,746 (53.5)  | 1.21(0.86–1.70)      |
| Elasomeran                                               | 62 (11.4)    | 498 (9.7)     | 1.26(0.83–1.91)      |
| Viral vector COVID-19 vaccines                           | 117 (20.2)   | 1,497 (25.9)  | 0.79(0.55–1.15)      |
| Vaxzevria                                                | 109 (20.0)   | 1,283 (25.0)  | 0.86(0.59–1.26)      |
| Gam-COVID-Vac                                            | 0 (0.0)      | 3 (0.1)       | NC                   |
| Ad26.COV2.S                                              | 7 (1.3)      | 186 (3.6)     | 0.38(0.17–0.87)      |
| Protein-based COVID-19 vaccines                          | 0 (0.0)      | 1 (0.0)       | NC                   |
| NVX-CoV2373                                              | 0 (0.0)      | 1 (0.0)       | NC                   |
| Others                                                   | 30 (5.2)     | 612 (10.6)    | 0.50(0.31–0.81)      |
| <b>Sensitivity analysis 4 (case=584, non-case=5,840)</b> |              |               |                      |
| The other vaccines                                       | 43 (7.2)     | 414 (6.9)     |                      |
| COVID-19 vaccines                                        | 554 (92.8)   | 5,556 (93.1)  | 0.96(0.69–1.33)      |
| mRNA COVID-19 vaccines                                   | 398 (66.7)   | 3,461 (58.0)  | 1.11(0.80–1.54)      |
| Tozinameran                                              | 330 (59.4)   | 2,883 (54.5)  | 1.10(0.79–1.54)      |
| Elasomeran                                               | 66 (11.9)    | 559 (10.6)    | 1.14(0.76–1.70)      |
| Viral vector COVID-19 vaccines                           | 119 (19.9)   | 1,474 (24.7)  | 0.78(0.54–1.12)      |
| Vaxzevria                                                | 110 (19.8)   | 1,241 (23.5)  | 0.85(0.59–1.24)      |
| Gam-COVID-Vac                                            | 0 (0.0)      | 1 (0.0)       | <.001 (<.001->999.9) |
| Ad26.COV2.S                                              | 7 (1.3)      | 193 (3.7)     | 0.35(0.15–0.79)      |
| Protein-based COVID-19 vaccines                          | 0 (0.0)      | 0 (0.0)       | -                    |

|                                                          |            |              |                 |
|----------------------------------------------------------|------------|--------------|-----------------|
| NVX-CoV2373                                              | 0 (0.0)    | 0 (0.0)      | -               |
| Others                                                   | 37 (6.2)   | 621 (10.4)   | 0.57(0.36–0.91) |
| <b>Sensitivity analysis 5 (case=591, non-case=5,910)</b> |            |              |                 |
| The other vaccines                                       | 47 (7.5)   | 344 (5.5)    |                 |
| COVID-19 vaccines                                        | 578 (92.5) | 5,906 (94.5) | 0.72(0.52–0.98) |
| mRNA COVID-19 vaccines                                   | 417 (66.7) | 4,078 (65.3) | 0.75(0.54–1.03) |
| Tozinameran                                              | 347 (59.4) | 3,582 (60.5) | 0.71(0.51–0.98) |
| Elasomeran                                               | 68 (11.6)  | 477 (8.1)    | 1.04(0.70–1.55) |
| Viral vector COVID-19 vaccines                           | 125 (20.0) | 1,558 (24.9) | 0.59(0.41–0.84) |
| Vaxzevria                                                | 115 (19.7) | 1,323 (22.3) | 0.64(0.44–0.91) |
| Gam-COVID-Vac                                            | 0 (0.0)    | 0 (0.0)      | NC              |
| Ad26.COV2.S                                              | 7 (1.2)    | 194 (3.3)    | 0.26(0.12–0.60) |
| Protein-based COVID-19 vaccines                          | 0 (0.0)    | 1 (0.0)      | NC              |
| NVX-CoV2373                                              | 0 (0.0)    | 1 (0.0)      | NC              |
| Others                                                   | 36 (5.8)   | 269 (4.3)    | 0.98(0.62–1.56) |
| <b>Sensitivity analysis 6 (case=197, non-case=1,970)</b> |            |              |                 |
| The other vaccines                                       | 10 (5.1)   | 76 (3.9)     |                 |
| COVID-19 vaccines                                        | 187 (94.9) | 1,894 (96.1) | 0.75(0.38–1.48) |
| mRNA COVID-19 vaccines                                   | 123 (62.4) | 1,164 (59.1) | 0.80(0.41–1.59) |
| Tozinameran                                              | 109 (56.8) | 1,025 (56.8) | 0.81(0.41–1.61) |
| Elasomeran                                               | 14 (7.3)   | 139 (7.7)    | 0.77(0.32–1.81) |
| Viral vector COVID-19 vaccines                           | 59 (30.0)  | 567 (28.8)   | 0.79(0.39–1.61) |
| Vaxzevria                                                | 57 (29.7)  | 554 (30.7)   | 0.78(0.38–1.60) |
| Gam-COVID-Vac                                            | 0 (0.0)    | 1 (0.1)      | NC              |
| Ad26.COV2.S                                              | 2 (1.0)    | 11 (0.6)     | 1.38(0.27–7.16) |
| Protein-based COVID-19 vaccines                          | 0 (0.0)    | 0 (0.0)      | NC              |
| NVX-CoV2373                                              | 0 (0.0)    | 0 (0.0)      | NC              |
| Others                                                   | 5 (2.5)    | 163 (8.3)    | 0.23(0.08–0.71) |
| <b>Sensitivity analysis 7 (case=606, non-case=6,060)</b> |            |              |                 |
| Influenza vaccines                                       | 20 (3.3)   | 89 (1.5)     | Reference       |
| COVID-19 vaccines                                        | 586 (96.7) | 5,971 (98.5) | 0.44(0.27–0.71) |
| mRNA COVID-19 vaccines                                   | 448 (73.9) | 4,071 (67.2) | 0.49(0.30–0.80) |
| Tozinameran                                              | 373 (62.2) | 3,376 (56.5) | 0.49(0.30–0.81) |
| Elasomeran                                               | 73 (12.2)  | 669 (11.2)   | 0.49(0.28–0.84) |
| Viral vector COVID-19 vaccines                           | 137 (22.6) | 1,893 (31.2) | 0.32(0.19–0.54) |
| Vaxzevria                                                | 126 (21.0) | 1,544 (25.8) | 0.36(0.22–0.61) |
| Gam-COVID-Vac                                            | 0 (0.0)    | 6 (0.1)      | NC              |
| Ad26.COV2.S                                              | 8 (1.3)    | 292 (4.9)    | 0.12(0.05–0.29) |
| Protein-based COVID-19 vaccines                          | 0 (0.0)    | 1 (0.0)      | NC              |
| NVX-CoV2373                                              | 0 (0.0)    | 1 (0.0)      | NC              |
| Others                                                   | 1 (0.2)    | 6 (0.1)      | 0.74(0.09–6.51) |

COVID-19, coronavirus disease 2019; ILD, interstitial lung disease; ROR, reporting odds ratio; NC, not calculated  
sensitivity analysis 1: included ICSRs of COVID-19 vaccines as suspected, concomitant, and interaction;  
sensitivity analysis 2: defined ILD including MedDRA SMQ narrow and broad terms (broad search); sensitivity  
analysis 4: excluded ICSRs that included drugs known to cause drug-induced ILD; sensitivity analysis 3: excluded  
reports containing adverse event special interest (AESI) of COVID-19 vaccines; sensitivity analysis 5: restricted to  
ICSRs reported serious AE following COVID-19 vaccination; sensitivity analysis 6: containing ICSRs with a  
reporting date before August 6, 2021; sensitivity analysis 7: compared the COVID-19 vaccines with the influenza  
vaccines as a positive control.

Supplementary Table 8. Characteristic of interstitial lung disease (ILD) and non-ILD of sensitivity analysis 7 (compared COVID-19 vaccines with influenza vaccines)

|                                                | ILD cases<br>(N=606) |        | Non-cases<br>(N=6,060) |        | p-value |
|------------------------------------------------|----------------------|--------|------------------------|--------|---------|
|                                                | N                    | %      | N                      | %      |         |
| Reported quarter (Q)                           |                      |        |                        |        | 0.0216  |
| 2020.4Q (Dec. 13, 2020~Dec. 31, 2020)          | 0                    | (0.0)  | 10                     | (0.2)  |         |
| 2021.1Q (Jan. 1, 2021 ~ Mar. 31, 2021)         | 47                   | (7.8)  | 645                    | (10.6) |         |
| 2021.2Q (Apr. 1, 2021 ~ Jun. 30, 2021)         | 100                  | (16.5) | 1,152                  | (19.0) |         |
| 2021.3Q (Jul. 1, 2021 ~ Sep. 30, 2021)         | 110                  | (18.2) | 847                    | (14.0) |         |
| 2021.4Q (Oct. 1, 2021 ~ Dec. 31, 2021)         | 96                   | (15.8) | 887                    | (14.6) |         |
| 2022.1Q (Jan. 1, 2022 ~ Mar. 31, 2022)         | 98                   | (16.2) | 843                    | (13.9) |         |
| 2022.2Q (Apr. 1, 2022 ~ Jun. 30, 2022)         | 66                   | (10.9) | 773                    | (12.8) |         |
| 2022.3Q (Jul. 1, 2022 ~ Sep. 30, 2022)         | 39                   | (6.4)  | 408                    | (6.7)  |         |
| 2022.4Q (Oct. 1, 2022 ~ Dec. 31, 2022)         | 40                   | (6.6)  | 426                    | (7.0)  |         |
| 2023.1Q (Jan. 1, 2023 ~ Jan. 26, 2023)         | 10                   | (1.7)  | 69                     | (1.1)  |         |
| Age groups                                     |                      |        |                        |        | 1       |
| 0~27 days                                      | 2                    | (0.3)  | 20                     | (0.3)  |         |
| 28 days to 23 months                           | 4                    | (0.7)  | 40                     | (0.7)  |         |
| 2~11 years                                     | 1                    | (0.2)  | 10                     | (0.2)  |         |
| 12~17 years                                    | 4                    | (0.7)  | 40                     | (0.7)  |         |
| 18~44 years                                    | 90                   | (14.9) | 900                    | (14.9) |         |
| 45~64 years                                    | 176                  | (29.0) | 1,760                  | (29.0) |         |
| 65~74 years                                    | 127                  | (21.0) | 1,270                  | (21.0) |         |
| ≥ 75 years                                     | 202                  | (33.3) | 2,020                  | (33.3) |         |
| Sex                                            |                      |        |                        |        | 1       |
| Male                                           | 318                  | (52.5) | 3,180                  | (52.5) |         |
| Female                                         | 288                  | (47.5) | 2,880                  | (47.5) |         |
| Report type                                    |                      |        |                        |        | <.0001  |
| Spontaneous                                    | 567                  | (93.6) | 5,651                  | (93.3) |         |
| Report from study                              | 33                   | (5.5)  | 182                    | (3.0)  |         |
| Other                                          | 6                    | (1.0)  | 226                    | (3.7)  |         |
| Not available to sender (unknown)              | 0                    | (0.0)  | 1                      | (0.0)  |         |
| Vaccines type                                  |                      |        |                        |        |         |
| COVID-19 vaccines                              | 586                  | (96.7) | 5,971                  | (98.5) | 0.0007  |
| Tozinameran                                    | 376                  | (62.1) | 3,437                  | (56.7) | 0.0115  |
| Elasomeran                                     | 78                   | (12.9) | 715                    | (11.8) | 0.4368  |
| Vaxzevria                                      | 129                  | (21.3) | 1,589                  | (26.2) | 0.0081  |
| Ad26.COVS.2                                    | 0                    | (0.0)  | 6                      | (0.1)  | 0.4384  |
| Gam-COVID-Vac                                  | 8                    | (1.3)  | 298                    | (4.9)  | <.0001  |
| NVX-CoV2373                                    | 0                    | (0.0)  | 1                      | (0.0)  | 1       |
| Influenza vaccines                             | 34                   | (5.6)  | 133                    | (2.2)  | <.0001  |
| Pneumococcal vaccines                          | 5                    | (0.8)  | 9                      | (0.2)  | 0.0005  |
| Drug known to cause ILD included in the ICSRst |                      |        |                        |        |         |
| Cancer therapy                                 | 15                   | (2.5)  | 2                      | (0.0)  | <.0001  |
| Rheumatology therapy                           | 21                   | (3.5)  | 25                     | (0.4)  | <.0001  |
| Anti-infection agent                           | 3                    | (0.5)  | 6                      | (0.1)  | 0.0414  |
| Cardiology drugs                               | 55                   | (9.1)  | 244                    | (4.0)  | <.0001  |
| Serious                                        |                      |        |                        |        | <.0001  |
| Yes                                            | 561                  | (92.6) | 2,311                  | (38.1) |         |
| Seriousness                                    |                      |        |                        |        | <.0001  |
| Death                                          | 267                  | (4.4)  | 98                     | (16.2) |         |

|                                          |              |              |        |
|------------------------------------------|--------------|--------------|--------|
| Life threatening                         | 128 (2.1)    | 95 (15.7)    |        |
| Caused/Prolonged Hospitalization         | 576 (9.5)    | 254 (41.9)   |        |
| Disabling/Incapacitating                 | 88 (1.5)     | 13 (2.2)     |        |
| Congenital anomaly/Birth defect          | 1 (0.0)      | 0 (0.0)      |        |
| Other                                    | 1,251 (20.6) | 101 (16.7)   |        |
| Region                                   |              |              | <.0001 |
| African                                  | 4 (0.7)      | 333 (5.5)    |        |
| Americas                                 | 32 (5.3)     | 507 (8.4)    |        |
| South-East Asia                          | 4 (0.7)      | 124 (2.1)    |        |
| European                                 | 533 (88.0)   | 4,276 (70.6) |        |
| Eastern Mediterranean                    | 6 (1.0)      | 127 (2.1)    |        |
| Western Pacific                          | 27 (4.5)     | 693 (11.4)   |        |
| Notifier type                            |              |              | <.0001 |
| Physician                                | 484 (79.9)   | 3,555 (58.7) |        |
| Pharmacist                               | 43 (7.1)     | 929 (15.3)   |        |
| Other Health Professional                | 79 (13.0)    | 1,576 (26.0) |        |
| Time to onset (case=549, non-case=5,743) |              |              | 0.2784 |
| Mean±SD                                  | 32.5±59.4    | 29.6±58.7    |        |
| Median (Q1-Q3)                           | 8 (2-36)     | 1 (0-18)     |        |

ILD; interstitial lung disease, SD; standard deviation

<sup>†</sup> Cancer therapy: bleomycin; gemcitabine; Epidermal Growth Factor Receptor (EGFR)-targeted agent (erlotinib, gefitinib, panitumumab, cetuximab); mammalian target of rapamycin (MTOR)-inhibitor (everolimus, temsirolimus, sirolimus); immune checkpoint inhibitor (nivolumab, pembrolizumab, avelumab, durvalumab, ipilimumab), rheumatology drugs: methotrexate; leflunomide, biological disease-modifying anti-rheumatic drugs (DMARDs) (tumor necrosis factor (TNF) agent (infliximab, etanercept, adalimumab), tocilizumab, rituximab), anti-infection agents (nitrofurantoin, daptomycin, interferon), cardiology drugs (amiodarone, bepridil, statin (lovastatin, simvastatin, pravastatin, atorvastatin, fluvastatin, rosuvastatin, cerivastatin))

Supplementary Table 9. Reporting odds ratio (ROR) of subgroups analyses in sensitivity analysis 7

| Type of analysis                   | ILD-cases    | Non-cases    | ROR (95% CI)    |
|------------------------------------|--------------|--------------|-----------------|
| <b>Subgroup analysis 1, age</b>    |              |              |                 |
| Age<65 (case=277, non-case=2,770)  |              |              |                 |
| The other vaccines                 | 9 (3.3)      | 33 (1.2)     |                 |
| COVID-19 vaccines                  | 268 (96.8)   | 2,737 (98.8) | 0.36(0.17–0.76) |
| mRNA COVID-19 vaccines             | 198 (71.5)   | 1,783 (64.4) | 0.41(0.19–0.86) |
| Tozinameran                        | 1,460 (53.4) | 158 (57.3)   | 0.40(0.19–0.84) |
| Elasomeran                         | 308 (11.3)   | 40 (14.5)    | 0.48(0.21–1.07) |
| Viral vector COVID-19 vaccines     | 70 (25.3)    | 953 (34.4)   | 0.27(0.12–0.59) |
| Vaxzevria                          | 743 (27.2)   | 64 (23.2)    | 0.32(0.15–0.69) |
| Gam-COVID-Vac                      | 4 (0.2)      | 0 (0.0)      | NC              |
| Ad26.COV2.S                        | 188 (6.9)    | 5 (1.8)      | 0.10(0.03–0.31) |
| Protein-based COVID-19 vaccines    | 0 (0.0)      | 0 (0.0)      | NC              |
| NVX-CoV2373                        | 0 (0.0)      | 0 (0.0)      | NC              |
| Others                             | 0 (0.0)      | 1 (0.0)      | NC              |
| Age≥65 (case=329, non-case=3,290)  |              |              |                 |
| The other vaccines                 | 11 (3.3)     | 56 (1.7)     |                 |
| COVID-19 vaccines                  | 318 (96.7)   | 3,234 (98.3) | 0.50(0.26–0.97) |
| mRNA COVID-19 vaccines             | 250 (76.0)   | 2,288 (69.5) | 0.56(0.29–1.08) |
| Tozinameran                        | 215 (66.4)   | 1,916 (59.1) | 0.57(0.30–1.11) |
| Elasomeran                         | 33 (10.2)    | 361 (11.1)   | 0.47(0.22–0.97) |
| Viral vector COVID-19 vaccines     | 67 (20.4)    | 940 (28.6)   | 0.36(0.18–0.73) |
| Vaxzevria                          | 62 (19.1)    | 801 (24.7)   | 0.39(0.20–0.79) |
| Gam-COVID-Vac                      | 0 (0.0)      | 2 (0.1)      | NC              |
| Ad26.COV2.S                        | 3 (0.9)      | 104 (3.2)    | 0.15(0.04–0.55) |
| Protein-based COVID-19 vaccines    | 0 (0.0)      | 1 (0.0)      | NC              |
| NVX-CoV2373                        | 0 (0.0)      | 1 (0.0)      | NC              |
| Others                             | 1 (0.3)      | 5 (0.2)      | 1.02(0.11–9.59) |
| <b>Subgroup analysis 2, gender</b> |              |              |                 |
| Male (case=318, non-case=3,180)    |              |              |                 |
| The other vaccines                 | 11 (3.5)     | 47 (1.5)     |                 |
| COVID-19 vaccines                  | 307 (96.5)   | 3,133 (98.5) | 0.42(0.22–0.82) |
| mRNA COVID-19 vaccines             | 235 (73.9)   | 2,107 (66.3) | 0.48(0.24–0.93) |
| Tozinameran                        | 194 (61.6)   | 1,739 (55.4) | 0.48(0.24–0.93) |
| Elasomeran                         | 40 (12.7)    | 356 (11.3)   | 0.48(0.23–1.00) |
| Viral vector COVID-19 vaccines     | 71 (22.3)    | 1,026 (32.3) | 0.30(0.15–0.60) |
| Vaxzevria                          | 67 (21.3)    | 810 (25.8)   | 0.35(0.18–0.71) |
| Gam-COVID-Vac                      | 0 (0.0)      | 4 (0.1)      | NC              |
| Ad26.COV2.S                        | 3 (1.0)      | 182 (5.8)    | 0.07(0.02–0.26) |
| Protein-based COVID-19 vaccines    | 0 (0.0)      | 0 (0.0)      | NC              |
| NVX-CoV2373                        | 0 (0.0)      | 0 (0.0)      | NC              |
| Others                             | 1 (0.3)      | 0 (0.0)      | NC              |
| Female (case=288, non-case=2,880)  |              |              |                 |
| The other vaccines                 | 9 (3.1)      | 42 (1.5)     |                 |
| COVID-19 vaccines                  | 279 (96.9)   | 2,838 (98.5) | 0.46(0.22–0.95) |
| mRNA COVID-19 vaccines             | 213 (74.0)   | 1,964 (68.2) | 0.51(0.24–1.05) |
| Tozinameran                        | 179 (62.8)   | 1,637 (57.7) | 0.51(0.24–1.07) |
| Elasomeran                         | 33 (11.6)    | 313 (11.0)   | 0.49(0.22–1.10) |
| Viral vector COVID-19 vaccines     | 66 (22.9)    | 867 (30.1)   | 0.36(0.17–0.76) |
| Vaxzevria                          | 59 (20.7)    | 734 (25.9)   | 0.38(0.17–0.81) |
| Gam-COVID-Vac                      | 0 (0.0)      | 2 (0.1)      | NC              |

|                                                |            |              |                 |
|------------------------------------------------|------------|--------------|-----------------|
| Ad26.COVS2.S                                   | 5 (1.8)    | 110 (3.9)    | 0.21(0.07–0.67) |
| Protein-based COVID-19 vaccines                | 0 (0.0)    | 1 (0.0)      | NC              |
| NVX-CoV2373                                    | 0 (0.0)    | 1 (0.0)      | NC              |
| Others                                         | 0 (0.0)    | 6 (0.2)      | NC              |
| <b>Subgroup analysis 3, region</b>             |            |              |                 |
| Western Pacific Region (case=27, non-case=693) |            |              |                 |
| The other vaccines                             | 3 (11.1)   | 17 (2.5)     |                 |
| COVID-19 vaccines                              | 24 (88.9)  | 676 (97.6)   | 0.20(0.06–0.73) |
| mRNA COVID-19 vaccines                         | 14 (51.9)  | 376 (54.3)   | 0.21(0.06–0.80) |
| Tozinameran                                    | 13 (52.0)  | 330 (48.1)   | 0.22(0.06–0.86) |
| Elasomeran                                     | 1 (4.0)    | 46 (6.7)     | 0.12(0.01–1.27) |
| Viral vector COVID-19 vaccines                 | 10 (37.0)  | 298 (43.0)   | 0.19(0.05–0.76) |
| Vaxzevria                                      | 8 (32.0)   | 240 (35.0)   | 0.19(0.05–0.78) |
| Gam-COVID-Vac                                  | 0 (0.0)    | 0 (0.0)      | NC              |
| Ad26.COVS2.S                                   | 0 (0.0)    | 52 (7.6)     | NC              |
| Protein-based COVID-19 vaccines                | 0 (0.0)    | 1 (0.1)      | NC              |
| NVX-CoV2373                                    | 0 (0.0)    | 1 (0.2)      | NC              |
| Others                                         | 0 (0.0)    | 1 (0.1)      | NC              |
| The other regions (case=579, non-case=5,367)   |            |              |                 |
| The other vaccines                             | 17 (2.9)   | 72 (1.3)     |                 |
| COVID-19 vaccines                              | 562 (97.1) | 5,295 (98.7) | 0.45(0.26–0.77) |
| mRNA COVID-19 vaccines                         | 434 (75.0) | 3,695 (68.9) | 0.50(0.29–0.85) |
| Tozinameran                                    | 360 (62.6) | 3,046 (57.6) | 0.50(0.29–0.86) |
| Elasomeran                                     | 72 (12.5)  | 623 (11.8)   | 0.49(0.27–0.88) |
| Viral vector COVID-19 vaccines                 | 127 (21.9) | 1,595 (29.7) | 0.34(0.19–0.59) |
| Vaxzevria                                      | 118 (20.5) | 1,304 (24.7) | 0.38(0.22–0.67) |
| Gam-COVID-Vac                                  | 0 (0.0)    | 6 (0.1)      | NC              |
| Ad26.COVS2.S                                   | 8 (1.4)    | 240 (4.5)    | 0.14(0.06–0.34) |
| Protein-based COVID-19 vaccines                | 0 (0.0)    | 0 (0.0)      | NC              |
| NVX-CoV2373                                    | 0 (0.0)    | 0 (0.0)      | NC              |
| Others                                         | 1 (0.2)    | 5 (0.1)      | 0.85(0.09–7.73) |

COVID-19, coronavirus disease 2019; ILD, interstitial lung disease; ROR, reporting odds ratio; NC, not calculated
